# Supplementary material for: Association of Methylenetetrahydrofolate Reductase C677T Gene Polymorphisms with Mild Cognitive Impairment Susceptibility: A Systematic Review and Meta-Analysis
Source: Hindawi journal article supplement (doi:10.1155/2021/2962792), 2021-09-18
Supplement: f1 [file 2962792.f1.zip]

# Supplementary Materials

## Supplementary Table 1

| Database          | Search strategy                                                                                                                                                                                                                                                                                               | Total |
|-------------------|---------------------------------------------------------------------------------------------------------------------------------------------------------------------------------------------------------------------------------------------------------------------------------------------------------------|-------|
| Pubmed            | (((MTHFR[Title/Abstract]) OR<br>(C677T[Title/Abstract])) OR<br>(Homocysteine[Title/Abstract])) AND<br>(((polymorphism[Title/Abstract]) OR<br>(variant[Title/Abstract])) OR<br>(mutation[Title/Abstract])) OR<br>(SNP[Title/Abstract])) AND<br>((cognitive[Title/Abstract]) OR<br>(cognition[Title/Abstract])) | 103   |
|                   | (mthfr:ab,ti OR c677t:ab,ti OR homocysteine:ab,ti)<br>AND (polymorphism:ab,ti OR variant:ab,ti OR<br>mutation:ab,ti OR snp:ab,ti) AND (cognitive:ab,ti<br>OR cognition:ab,ti)                                                                                                                                 | 159   |
| Embase            | TS= (MTHFR OR C677T OR Homocysteine)                                                                                                                                                                                                                                                                          | 264   |
| Web of<br>Science | TS= (polymorphism OR variant OR mutation OR<br>SNP)<br>TS= (cognitive OR cognition)                                                                                                                                                                                                                           |       |
|                   | #1 AND #2 AND #3                                                                                                                                                                                                                                                                                              |       |
| CNKI              | Topic: MTHFR or C677T                                                                                                                                                                                                                                                                                         | 8     |
