# Supplementary figures and images for: Association of Methylenetetrahydrofolate Reductase C677T Gene Polymorphisms with Mild Cognitive Impairment Susceptibility: A Systematic Review and Meta-Analysis
Source: Hindawi journal article supplement (doi:10.1155/2021/2962792), 2021-09-18

(a)

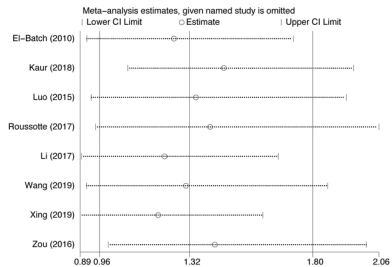

(b)

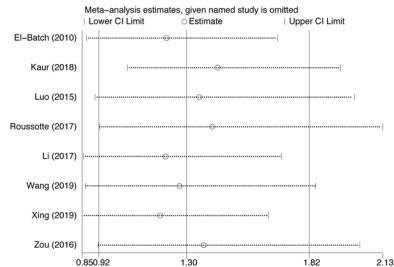

(c)

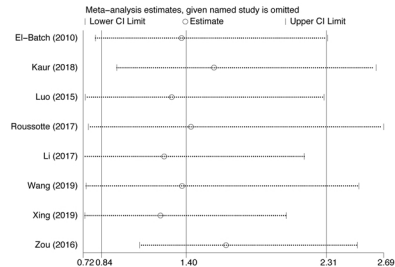

(d)

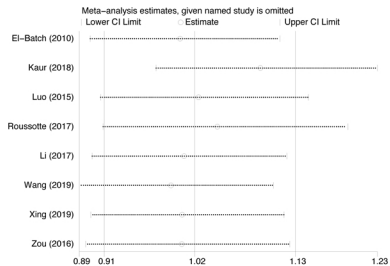

(e)

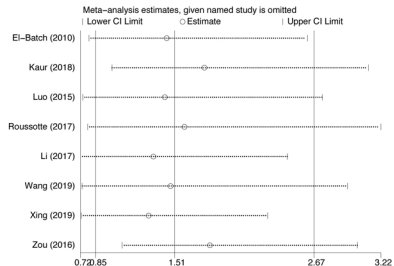

Supplement: f1 [file 2962792.f1.zip]
